# Supplementary material
Source: PubMed Central journal article supplement (PMC2171028)
Supplement: NIHMS34143-supplement-01.pdf [file NIHMS34143-supplement-01.pdf]

**Table S.1.** Mass spectrometry data for 0305 $\phi$ 8-36 proteins detected by HPLC-ESI-MS/MS.

| <b>Protein identifier (gp)</b> | <b>Protein molecular weight (kDa)</b> | <b>Protein identification probability (%)<sup>1</sup></b> | <b>Number of unique peptides</b> | <b>Number of unique spectra</b> | <b>Number of total spectra</b> | <b>Percentage sequence coverage (%)</b> |
|--------------------------------|---------------------------------------|-----------------------------------------------------------|----------------------------------|---------------------------------|--------------------------------|-----------------------------------------|
| 113                            | 20.4                                  | 100                                                       | 11                               | 26                              | 64                             | 66                                      |
| 114                            | 26.4                                  | 100                                                       | 4                                | 5                               | 8                              | 24                                      |
| 116                            | 20.2                                  | 98                                                        | 1                                | 1                               | 3                              | 8                                       |
| 118                            | 49.1                                  | 100                                                       | 1                                | 1                               | 1                              | 3                                       |
| 119                            | 43.2                                  | 100                                                       | 23                               | 68                              | 223                            | 66                                      |
| 122                            | 72.8                                  | 100                                                       | 13                               | 28                              | 50                             | 25                                      |
| 124                            | 40.1                                  | 100                                                       | 20                               | 47                              | 128                            | 72                                      |
| 125                            | 44.4                                  | 100                                                       | 14                               | 71                              | 190                            | 45                                      |
| 127                            | 37.0                                  | 100                                                       | 5                                | 8                               | 13                             | 16                                      |
| 128                            | 16.5                                  | 99                                                        | 1                                | 2                               | 4                              | 8                                       |
| 129                            | 110.8                                 | 100                                                       | 42                               | 118                             | 307                            | 54                                      |
| 130                            | 123.3                                 | 100                                                       | 3                                | 3                               | 3                              | 4                                       |
| 131                            | 13.2                                  | 100                                                       | 4                                | 13                              | 34                             | 46                                      |
| 132                            | 41.6                                  | 100                                                       | 5                                | 9                               | 12                             | 18                                      |
| 133                            | 100.4                                 | 100                                                       | 15                               | 28                              | 43                             | 22                                      |
| 134                            | 14.0                                  | 100                                                       | 2                                | 6                               | 9                              | 25                                      |
| 135                            | 32.6                                  | 100                                                       | 4                                | 6                               | 7                              | 14                                      |
| 136                            | 20.7                                  | 100                                                       | 3                                | 3                               | 5                              | 16                                      |
| 137                            | 60.4                                  | 100                                                       | 3                                | 3                               | 3                              | 9                                       |

|                   | <b>Protein</b>   | <b>Protein</b>         |                  |                  |                 | <b>Percentage</b> |
|-------------------|------------------|------------------------|------------------|------------------|-----------------|-------------------|
| <b>Protein</b>    | <b>molecular</b> | <b>identification</b>  | <b>Number</b>    | <b>Number</b>    | <b>Number</b>   | <b>sequence</b>   |
| <b>identifier</b> | <b>weight</b>    | <b>probability</b>     | <b>of unique</b> | <b>of unique</b> | <b>of total</b> | <b>coverage</b>   |
| <b>(gp)</b>       | <b>(kDa)</b>     | <b>(%)<sup>1</sup></b> | <b>peptides</b>  | <b>spectra</b>   | <b>spectra</b>  | <b>(%)</b>        |
| 138               | 26.4             | 100                    | 6                | 13               | 21              | 26                |
| 139               | 78.2             | 100                    | 45               | 148              | 373             | 69                |
| 140               | 27.9             | 100                    | 14               | 62               | 188             | 65                |
| 141               | 54.8             | 100                    | 4                | 6                | 10              | 8                 |
| 142               | 63.2             | 100                    | 16               | 27               | 43              | 35                |
| 145               | 220.4            | 100                    | 5                | 6                | 6               | 3                 |
| 146               | 287.6            | 100                    | 69               | 100              | 144             | 31                |
| 151               | 30.3             | 100                    | 9                | 19               | 34              | 37                |
| 152               | 29.9             | 100                    | 11               | 22               | 42              | 45                |
| 153               | 43.5             | 100                    | 7                | 8                | 12              | 26                |
| 154               | 136.6            | 100                    | 34               | 58               | 98              | 32                |
| 155               | 106.8            | 100                    | 23               | 37               | 59              | 33                |
| 156               | 22.6             | 100                    | 3                | 6                | 9               | 24                |
| 157               | 14.7             | 98                     | 1                | 2                | 3               | 7                 |
| 158               | 32.8             | 100                    | 8                | 21               | 36              | 31                |
| 159               | 30.5             | 100                    | 8                | 12               | 21              | 28                |
| 160               | 29.3             | 100                    | 6                | 10               | 22              | 33                |
| 161               | 12.8             | 100                    | 6                | 13               | 28              | 69                |
| 162               | 44.1             | 81                     | 1                | 1                | 1               | 2                 |
| 163               | 243.7            | 100                    | 68               | 121              | 206             | 35                |
| 164               | 122.2            | 100                    | 17               | 33               | 49              | 20                |
| 165               | 48.5             | 100                    | 6                | 8                | 12              | 18                |
| 166               | 46.1             | 100                    | 6                | 9                | 14              | 19                |

| <b>Protein identifier (gp)</b> | <b>Protein molecular weight (kDa)</b> | <b>Protein identification probability (%)<sup>1</sup></b> | <b>Number of unique peptides</b> | <b>Number of unique spectra</b> | <b>Number of total spectra</b> | <b>Percentage sequence coverage (%)</b> |
|--------------------------------|---------------------------------------|-----------------------------------------------------------|----------------------------------|---------------------------------|--------------------------------|-----------------------------------------|
| 167                            | 65.9                                  | 100                                                       | 13                               | 26                              | 49                             | 32                                      |
| 168                            | 77.3                                  | 100                                                       | 23                               | 65                              | 141                            | 41                                      |
| 171                            | 88.5                                  | 100                                                       | 18                               | 27                              | 41                             | 22                                      |
| 172                            | 68.5                                  | 100                                                       | 1                                | 2                               | 3                              | 2                                       |
| 173                            | 79.9                                  | 99                                                        | 1                                | 1                               | 1                              | 2                                       |
| 174                            | 9.5                                   | 100                                                       | 2                                | 3                               | 5                              | 26                                      |
| 175                            | 46.2                                  | 100                                                       | 6                                | 9                               | 13                             | 23                                      |
| 197                            | 9.0                                   | 88                                                        | 1                                | 1                               | 3                              | 14                                      |
| 198                            | 15.4                                  | 100                                                       | 2                                | 3                               | 3                              | 16                                      |
| 199                            | 54.4                                  | 100                                                       | 10                               | 21                              | 39                             | 25                                      |
| 205                            | 18.8                                  | 100                                                       | 2                                | 2                               | 2                              | 14                                      |
| 209                            | 66.0                                  | 100                                                       | 2                                | 2                               | 4                              | 3                                       |
| 81                             | 9.3                                   | 100                                                       | 3                                | 5                               | 23                             | 69                                      |

<sup>1</sup>The protein identity probability was determined by Scaffold (Proteome Software).
